# Supplementary material
Source: PubMed Central journal article supplement (PMC5067802)
Supplement: Supp_Table1.pdf [file Supp_Table1.pdf]

SUPPLEMENTARY TABLE S1. NUMBER AND COUNTRY  
ORIGIN OF CHRONIC INFECTION (>1,000 DAYS p/s)  
SEQUENCES DOWNLOADED FROM LOS ALAMOS  
NATIONAL LABORATORY

| <i>Country</i> <sup>a</sup> | N (%)      |            |            |
|-----------------------------|------------|------------|------------|
|                             | <i>Vif</i> | <i>Vpr</i> | <i>Vpu</i> |
| AR                          | 1 (0.5)    | 1 (0.5)    | 1 (0.5)    |
| BR                          | 2 (1.1)    | 2 (1.1)    | 2 (1)      |
| BW                          | 50 (26.7)  | 50 (26.7)  | 50 (25.4)  |
| CN                          | 1 (0.5)    | 1 (0.5)    | 1 (0.5)    |
| CY                          | 2 (1.1)    | 2 (1.1)    | 2 (1)      |
| DJ                          | —          | —          | 1 (0.5)    |
| DK                          | 1 (0.5)    | 1 (0.5)    | 1 (0.5)    |
| ES                          | 3 (1.6)    | 3 (1.6)    | 3 (1.5)    |
| ET                          | 2 (1.1)    | 2 (1.1)    | 2 (1)      |
| FI                          | —          | —          | 3 (1.5)    |
| IL                          | 2 (1.1)    | 2 (1.1)    | 2 (1)      |
| IN                          | 4 (2.1)    | 4 (2.1)    | 6 (3)      |
| KE                          | 1 (0.5)    | 1 (0.5)    | 1 (0.5)    |
| MM                          | 1 (0.5)    | 1 (0.5)    | 1 (0.5)    |
| MW                          | 1 (0.5)    | 1 (0.5)    | 1 (0.5)    |
| SN                          | —          | —          | 1 (0.5)    |
| SO                          | —          | —          | 1 (0.5)    |
| TZ                          | 14 (7.5)   | 14 (7.5)   | 14 (7.1)   |
| UG                          | —          | —          | 1 (0.5)    |
| UY                          | 1 (0.5)    | 1 (0.5)    | 1 (0.5)    |
| ZA                          | 96 (51.3)  | 96 (51.3)  | 96 (48.7)  |
| ZM                          | 5 (2.7)    | 5 (2.7)    | 6 (3)      |
| TOTAL                       | 187        | 187        | 197        |

<sup>a</sup>Two-letter country codes ([www.iso.org/iso/country\\_codes](http://www.iso.org/iso/country_codes)).  
p/s, postseroconversion.
